# Supplementary material
Source: HighWire-hosted journal article supplement (https://jnm.snmjournals.org/highwire/filestream/94606/field_highwire_adjunct_files/0/125401_Supplemental_Data.pdf)
Supplement: 125401_Supplemental_Data.pdf [file 125401_Supplemental_Data.pdf]

## TRANSAXIAL SLICES

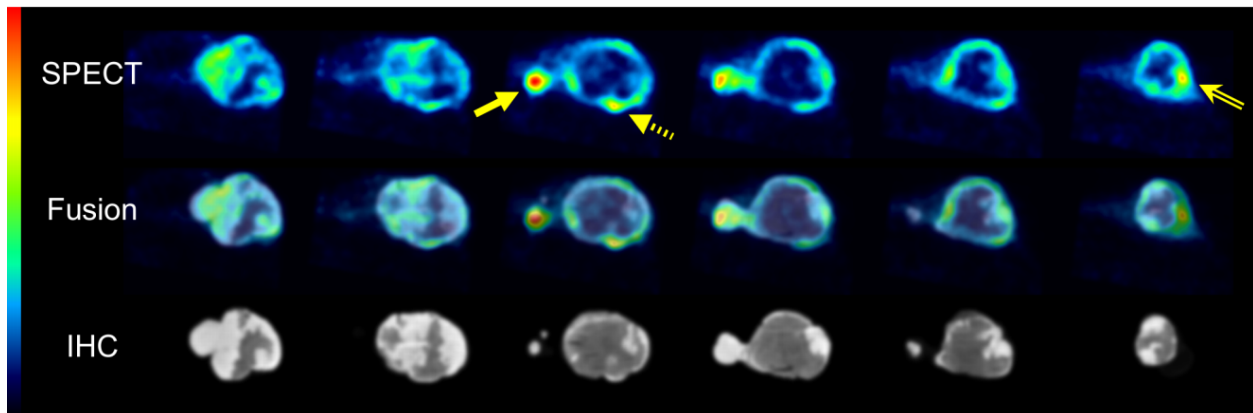

## SAGITTAL SLICES

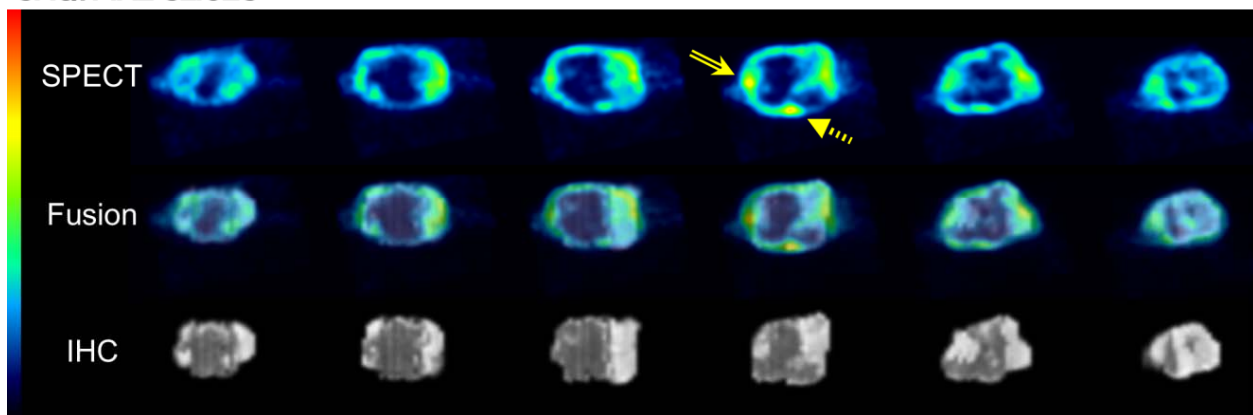

## CORONAL SLICES

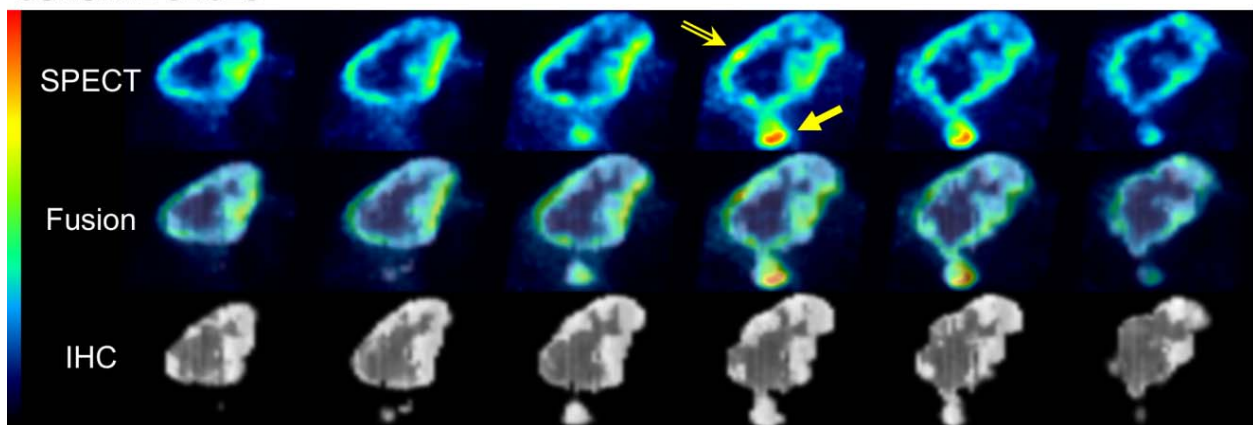

**SUPPLEMENTAL FIGURE 1.** High-resolution in vivo SPECT slices of  $^{111}\text{In}$  distribution in A431 xenograft compared with cross-sections through registered 3D immunohistochemistry (IHC) stack, resulting from same mouse as shown in Figure 3A. Top rows: equidistant consecutive SPECT slices; middle rows: registered IHC slices stained for EGFr expression, with voxels outside EGFr region set to zero; bottom rows: fused SPECT/IHC images. Arrows point to hot spots located mostly outside EGFr regions. The sagittal and coronal cross sections through the EGFr-stained histology volume, which are perpendicular to the sectioning plane, show that the employed registration method generally results in mostly smooth edges, allowing a clear differentiation between high- and low-EGFr-expressing regions. Truncated sections at the far ends of the tumor were too small or too homogeneous to be matched to the block-face photographs.

### TRANSAXIAL SLICES

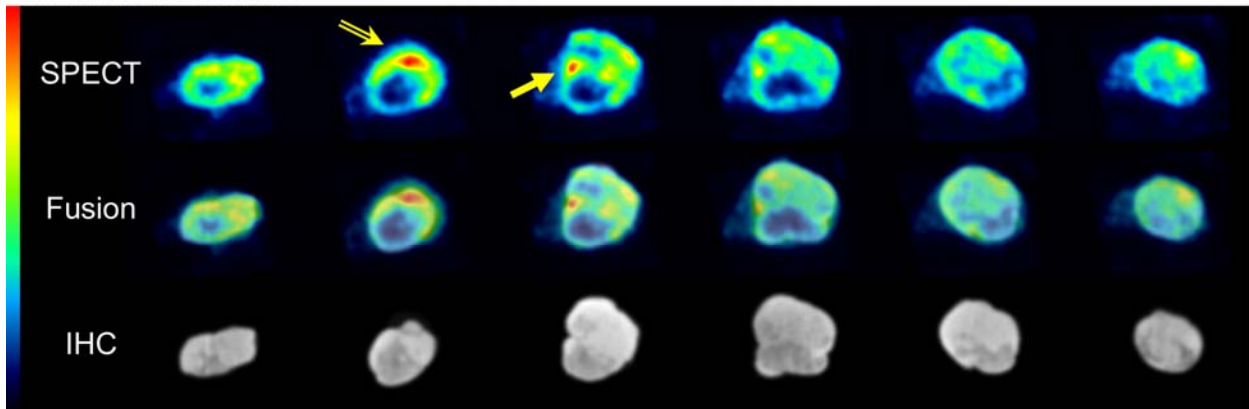

### SAGITTAL SLICES

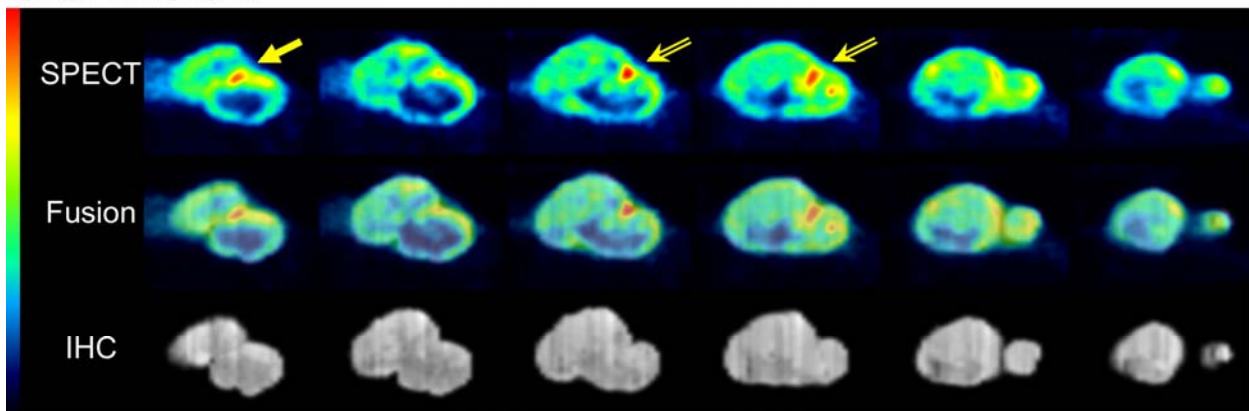

### CORONAL SLICES

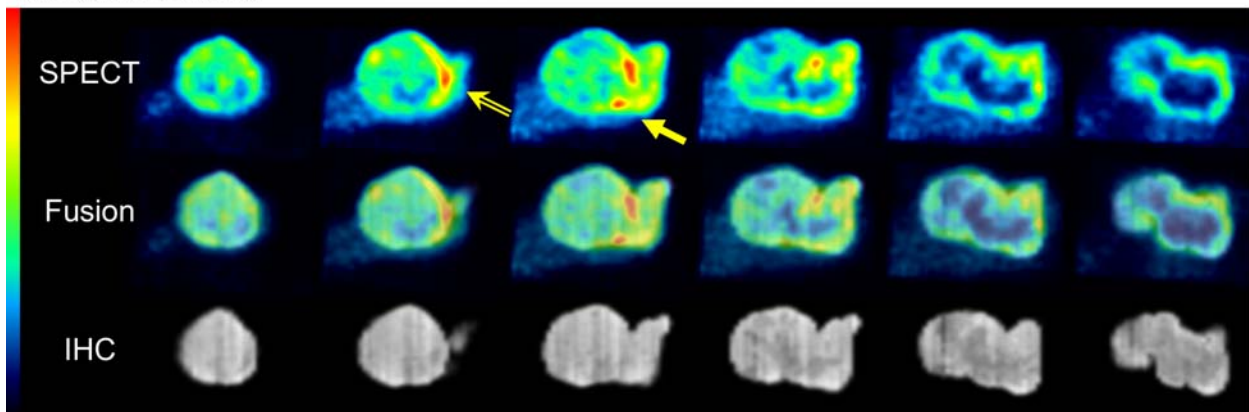

SUPPLEMENTAL FIGURE 2. Same as Supplemental Figure 1 but for the second mouse (Fig. 3B).

### TRANSAXIAL SLICES

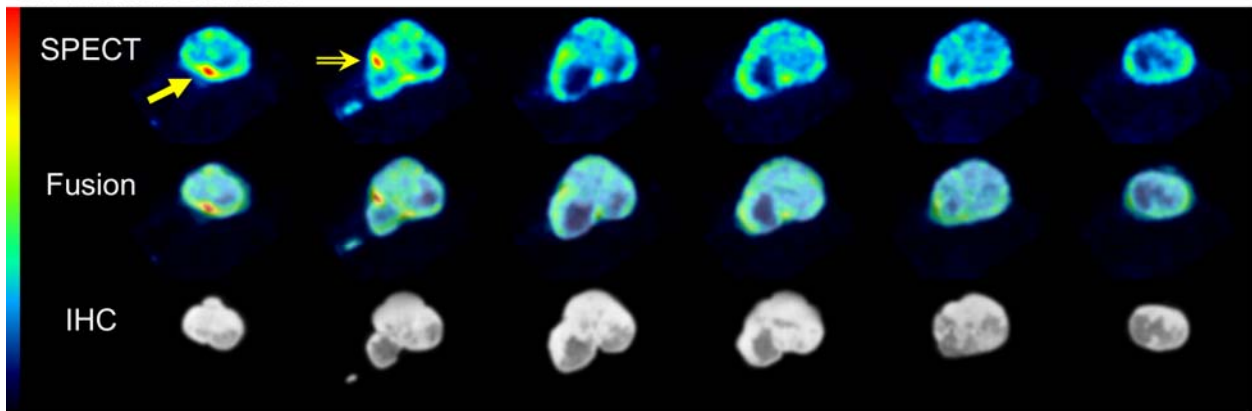

### SAGITTAL SLICES

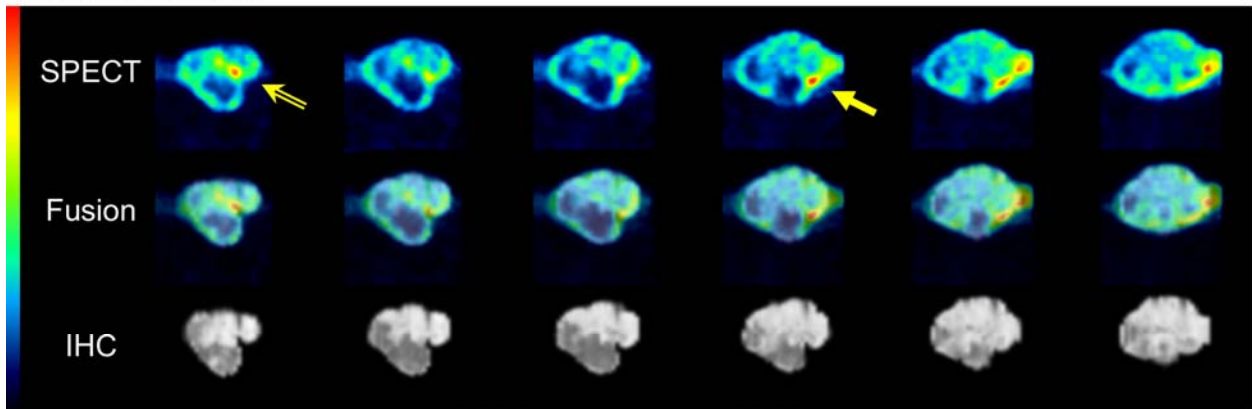

### CORONAL SLICES

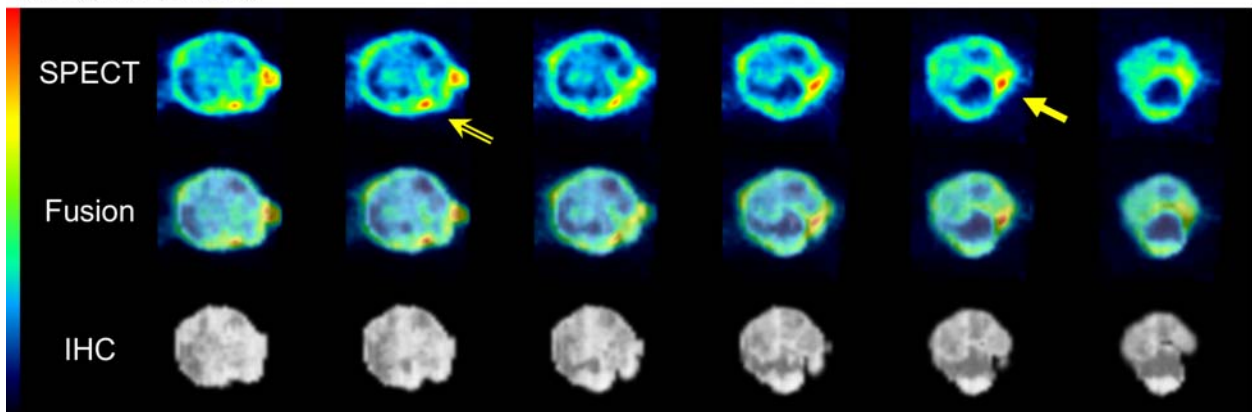

SUPPLEMENTAL FIGURE 3. Same as Supplemental Figure 1 but for the third mouse (Fig. 3C).
